# Supplementary material for: Discrimination of ranges of closely related RNA targets using CRISPR based detection assay developed using machine learning based optimization
Source: Research Square preprint supplement (doi:10.21203/rs.3.rs-7041916/v1), 2025-08-08
Supplement: Supplementary file 2 [file 372596294c2b61e0fc8ef7e3.xlsx]

## Sheet: Table S1 - SARS-CoV-2 guides
Supplmentary Table S1. Performance of SARS-CoV-2 specific (black) guide sequences
	Target
Guide #	Wuhan-Hu-1			BANAL-236			RaTG13			RShSTT182			MP789			Guangxi-P4L			RsYN04			BANAL-247			RacCS203			RsYN03			SL-CoVZC45			RpYN06			Rc-o319			NTC
	n	IQR	activity	n	IQR	activity	n	IQR	activity	n	IQR	activity	n	IQR	activity	n	IQR	activity	n	IQR	activity	n	IQR	activity	n	IQR	activity	n	IQR	activity	n	IQR	activity	n	IQR	activity	n	IQR	activity	activity
1	0	n/a	2782.57	5	12	2328.38	6	14	283.562	5	13	1665.85	8	16	0	15	n/a	0	15	n/a	0	16	n/a	0	14	n/a	0	14	n/a	0	16	n/a	0	14	n/a	0	17	n/a	0	0
2	0	n/a	2617.92	5	14	1895.42	6	18	159.393	5	14	1507.47	8	13.25	0	14	n/a	0	15	n/a	42.5773	17	n/a	0	15	n/a	0	14	n/a	0	16	n/a	0	14	n/a	0	18	n/a	0	0
3	0	n/a	2147.26	4	8.75	1287.4	5	12	65.634	4	8	1521.22	7	10.5	0	13	n/a	0	15	n/a	0	17	n/a	0	15	n/a	0	14	n/a	0	16	n/a	0	14	n/a	0	18	n/a	0	0
4	0	n/a	1976.54	4	13.5	187.553	4	10.5	0	4	14	369.76	6	10	0	11	n/a	0	14	n/a	0	7	9.5	0	8	9.5	0	13	n/a	0	16	n/a	0	13	n/a	0	14	n/a	0	0
5	0	n/a	7431.74	4	13.5	1832.63	4	10.5	259.862	4	14	5234.34	6	10	0	11	n/a	0	13	n/a	0	6	5.75	0	7	7	2.33167	13	n/a	0	15	n/a	0	13	n/a	0	14	n/a	8.31633	0
6	0	n/a	7525.86	4	13.5	2055.41	4	10.5	722.197	4	14	1135.34	6	10	101.183	11	n/a	0	13	n/a	0	5	4	0	6	5.75	26.2843	13	n/a	0	15	n/a	0	13	n/a	139.109	14	n/a	4.83267	0
7	0	n/a	3288.97	4	13.5	341.197	4	10.5	132.001	4	14	138.08	6	10	0	11	n/a	0	13	n/a	12.9923	5	4	0	6	5.75	0	13	n/a	0	16	n/a	0	14	n/a	0	14	n/a	0	0
8	0	n/a	3747.7	4	13.5	1689.88	4	10.5	796.829	4	14	865.817	6	10	121.79	11	n/a	0	13	n/a	0	6	8	0	7	7.5	0	13	n/a	0	16	n/a	0	14	n/a	0	14	n/a	0	0
9	0	n/a	5613.92	4	13.5	4311.29	4	10.5	3875.72	4	14	4938.08	6	10	3329.61	11	n/a	270.281	12	n/a	37.8263	6	8	0	8	11	0	12	n/a	0	15	n/a	0	13	n/a	0	15	n/a	0	0
10	0	n/a	5852.15	4	13.5	1293.49	4	10.5	991.066	4	14	1271.11	6	10	458.078	11	n/a	0	11	n/a	0	7	14	0	9	n/a	25.7773	11	n/a	0	14	n/a	0	12	n/a	0	14	n/a	0.672	0
For each target: Column 1: n - number of mismatches (range 0 to 18 with higher values formated a more intense red) Column 2: IQR - rounded to the nearest integer (optimal value 14 (green) with higher and lower values formated a more intense green and red, respectively). The IQR cannot be calculated for n=0, n=1 and n>8 (n/a - not available). Column 3: activity - averged background subtracted fluo…
			DISTRIBUTION STATEMENT A. Approved for public release: distribution is unlimited.

## Sheet: Table S2 - SARS-like-CoV guides
Supplementary Table S2. Performance of zoonotic sarbecovirus specific guide sequences
	Target
Guide	Wuhan-Hu-1			BANAL-236			RaTG13			RShSTT182			MP789			Guangxi-P4L			RsYN04			BANAL-247			RacCS203			RsYN03			SL-CoVZC45			RpYN06			Rco319			NTC
	n	IQR	activity	n	IQR	activity	n	IQR	activity	n	IQR	activity	n	IQR	activity	n	IQR	activity	n	IQR	activity	n	IQR	activity	n	IQR	activity	n	IQR	activity	n	IQR	activity	n	IQR	activity	n	IQR	activity	activity
F11G-dkrd-1	1	n/a	5621.4	2	3	4595.21	3	9	3588.08	2	3	4957.79	2	9	5212.62	0	n/a	6133.26	>8	n/a	0	>8	n/a	0	>8	n/a	0	>8	n/a	0	7	8	0	8	7.25	0	7	7	0	0
F11G-dkrd-2	2	6	3744.16	1	n/a	4519.85	0	n/a	4178.14	1	n/a	2979.34	1	n/a	4296.01	3	9	2142.31	>8	n/a	0	6	7.25	0	6	7.25	0	8	10.25	32.7857	6	9.75	0	8	10.25	0	7	5.5	0	0
F11G-dkrd-3	0	n/a	3425.8	1	n/a	2009	0	n/a	3390.27	0	n/a	3582.63	1	n/a	2734.63	3	4.5	284.602	>8	n/a	0	5	6	0	5	6	0	7	5.5	0	5	7	0	3	5.5	883.563	7	13	0	0
F11G-dkrd-5	1	n/a	1789.75	0	n/a	2811.11	1	n/a	2059.31	1	n/a	970.739	0	n/a	2713.7	2	3	1682.33	>8	n/a	0	6	6.5	0	6	6.5	0	6	4	0	4	9.25	453.15	2	5.5	1481.5	6	14.25	0	0
F11G-ltbl-21	8	12	0	8	12	0	7	11.5	243.513	8	9.75	0	>8	n/a	0	>8	n/a	52.45	0	n/a	1103.17	>8	n/a	37.54	>8	n/a	0	7	10	0	>8	n/a	0	8	9	0	>8	n/a	0	0
F11G-ltbl-122	8	13.5	34.5153	>8	n/a	0	>8	n/a	3.3	8	13.5	152.542	8	11.75	0	6	17	0	0	n/a	62.562	>8	n/a	0	>8	n/a	0	8	9.5	0	7	11.5	0	6	15.25	0	>8	n/a	0	0
F11G-ltbl-127	8	12.5	18.8807	>8	n/a	0	8	12.5	61.931	7	9	139.755	8	12.5	0	7	10	116.146	0	n/a	4380.38	>8	n/a	26.5	>8	n/a	16.01	7	16.5	191.058	6	10	2140.43	5	8	2620.49	8	17.5	0	0
F11G-ltbl-175	8	14.25	89.3577	6	13.5	14.1763	7	15.5	62.7417	8	17.25	0	8	14.25	0	>8	n/a	0	0	n/a	4839.95	8	14.25	0	8	14.25	0	5	9	2370.59	7	20.5	0	7	20.5	51.219	7	14	0	0
F11G-ltbl-177	8	14.5	44.1187	6	18.25	0	7	15.5	0	8	16.75	0.245	8	14.5	0	8	12.75	18.9427	0	n/a	5659.96	>8	n/a	47.34	>8	n/a	0	6	17.25	1113.51	7	20.5	0	7	20.5	0	8	16.75	0	0
F11G-grn-60	8	10.25	0	>8	n/a	5.4	>8	n/a	0	8	10.25	0	>8	n/a	0	>8	n/a	0	>8	n/a	0	1	n/a	41.0307	0	n/a	3975.86	>8	n/a		6	10.75	0	>8	n/a	0	>8	n/a	0	0
F11G-grn-87	8	10.75	0	8	10.75	0	8	10.75	0	>8	n/a	0	>8	n/a	0	>8	n/a	0	4	14.25	713.051	1	n/a	1849.19	1	n/a	5852.62	8	10	0	8	10.75	5.17833	8	10	0	>8	n/a	0	0
F11G-grn-91	8	10.75	0	8	10.75	0	8	10.75	0	8	10.75	0	>8	n/a	0	>8	n/a	26.93	3	7.5	0	1	n/a	57.2563	1	n/a	1334.92	8	10	0	8	10.75	1.791	8	10	0	8	10	0	0
F11G-grn-97	8	15.5	0	>8	n/a	33.77	8	15.5	0	>8	n/a	0	8	15.5	53.2047	>8	n/a	0	>8	n/a	0	0	n/a	2662.46	0	n/a	1689.2	8	6	75.395	6	13	0	8	11.75	0	7	7.5	0	0
F11G-grn-133	8	11	0	>8	n/a	0	>8	n/a	0	>8	n/a	0	>8	n/a	0	>8	n/a	0	>8	n/a	0	0	n/a	9379.39	1	n/a	9496.42	7	11.5	1913.92	>8	n/a	0	>8	n/a	0	>8	n/a	0	0
F11G-dkbl-24	8	8	0	8	8	0	8	8	0	8	13	0	7	6	0	6	9.75	0	7	12	0	5	6	0	8	10.5	0	0	n/a	5249.05	5	6	0	5	6	0	6	13.5	102.493	0
F11G-dkbl-25	8	7.25	0	7	5.5	0	8	6.5	0	8	7.25	0	7	13.5	0	3	11.5	3611.1	>8	n/a	0	>8	n/a	0	>8	n/a	0	0	n/a	4420.33	8	9.5	0	7	12	0	>8	n/a	0	0
F11G-dkbl-64	8	16	0	>8	n/a	17.3	>8	n/a	0	8	16	0	8	13.75	0	7	15.5	0	>8	n/a	0	>8	n/a	0	>8	n/a	0	0	n/a	2767.87	4	15	2061.35	4	11.25	105.514	8	9	0	0
F11G-dkbl-116	8	10.5	0	6	9.75	0	7	12	0	8	14	0	8	10.5	0	7	10.5	0	5	9	115.216	6	7.25	0	6	7.25	0	0	n/a	3347.51	4	15	1164.67	4	15	766.089	5	7	52.517	0
F11G-dkbl-150	8	12	1635.79	7	8.5	606.078	6	5	3047.28	7	8.5	3300	5	6	6169.53	6	9.75	2087.6	8	11.5	26.098	8	20.5	916.513	8	18	394.355	0	n/a	9136.73	7	8.5	1819.37	6	9.5	2620.7	6	9	3512.47	0
F11G-ylw-45	7	10.5	23.8503	7	9	38.4253	8	10.5	0	7	9	0	6	10.5	16.5123	5	18	3434.06	8	12.5	0	>8	n/a	0	>8	n/a	0	3	12	2643.22	1	n/a	8494.42	0	n/a	4136.04	7	11.5	0	0
F11G-ylw-75	7	9.5	0	7	9.5	0	6	6	0	6	6	4.32933	5	6	154.454	8	10.75	0	>8	n/a	0	7	9	0	5	6	2049.9	2	3	1860.48	1	n/a	9453.24	1	n/a	6475.12	4	5.5	1593.73	0
F11G-ylw-83	8	9.5	0	7	11	0	6	9.75	0	7	11	0	7	8.5	0	7	8	0	8	8.25	0	5	11	0	5	11	0	3	9	1475.92	0	n/a	8011.69	2	3	3281.07	6	9.75	0	0
F11G-ylw-86	8	9	2.65633	7	10	0	6	5	0	5	14	32.412	4	15	1755.1	6	7.5	18.4883	7	8	0	>8	n/a	0	>8	n/a	0	5	2	253.308	0	n/a	7204.72	0	n/a	4187.77	8	9	0	0
F11G-ylw-90	8	9	0	6	7	638.698	6	7	664.789	5	13	167.996	3	8	2338.06	6	12	225.933	>8	n/a	0	>8	n/a	0	>8	n/a	0	4	2.75	1992.21	0	n/a	4149.43	0	n/a	2442.2	>8	n/a	0	0
F11G-prpl-6	8	12	0	8	12	0	7	8.5	0	6	9.5	381.865	8	10.25	0	7	8.5	0	>8	n/a	0	>8	n/a	0	7	7.5	0	6	13.75	0	>8	n/a	0	>8	n/a	0	0	n/a	11015.2	0
F11G-prpl-23	8	14	0	7	15	1097.33	8	14	80.4913	>8	n/a	13.72	>8	n/a	0	6	9.75	1603.91	>8	n/a	0	>8	n/a	10.93	>8	n/a	0	6	9	4266.89	7	15	731.59	8	16.75	0	0	n/a	11013.8	0
F11G-prpl-54	8	14.75	179.938	8	14.75	0	>8	n/a	0	8	14.75	2191.22	>8	n/a	0	7	14	31.6837	>8	n/a	0	>8	n/a	18.02	>8	n/a	0	8	12.5	0	7	19.5	0	7	19.5	0	0	n/a	4611.68	0
F11G-prpl-105	8	14.5	0	8	14.5	0	7	14	0	7	9.5	0	7	14	0	8	13.75	14.3617	>8	n/a	0	>8	n/a	2.7	>8	n/a	0	6	12	0	5	17	2247.26	5	17	739.769	0	n/a	7780.38	0
For each target: Column 1: n - number of mismatches (range 0 to 18 with higher values formated a more intense red) Column 2: IQR - rounded to the nearest integer (optimal value 14 (green) with higher and lower values formated a more intense green and red, respectively). The IQR cannot be calculated for n=0, n=1 and n>8 (n/a - not available). Column 3: activity - averged background subtracted fluo…
			DISTRIBUTION STATEMENT A. Approved for public release: distribution is unlimited.

## Sheet: crRNAs
Sequences of crRNA oligo templates
name	guide sequence	hairpin sequence	crRNA oligo sequence
F11G1-1	GGGCACGTAGTGTAGCTAGTCAATCCAT	GTTTTAGTCCCCTTCGTTTTTGGGGTAGTCTAAATCCCCCTATAGTGAGTCGTATTAATTTC	GGGCACGTAGTGTAGCTAGTCAATCCATGTTTTAGTCCCCTTCGTTTTTGGGGTAGTCTAAATCCCCCTATAGTGAGTCGTATTAATTTC
F11G1-2	GGCACGTAGTGTAGCTAGTCAATCCATC	GTTTTAGTCCCCTTCGTTTTTGGGGTAGTCTAAATCCCCCTATAGTGAGTCGTATTAATTTC	GGCACGTAGTGTAGCTAGTCAATCCATCGTTTTAGTCCCCTTCGTTTTTGGGGTAGTCTAAATCCCCCTATAGTGAGTCGTATTAATTTC
F11G1-3	GCACGTAGTGTAGCTAGTCAATCCATCA	GTTTTAGTCCCCTTCGTTTTTGGGGTAGTCTAAATCCCCCTATAGTGAGTCGTATTAATTTC	GCACGTAGTGTAGCTAGTCAATCCATCAGTTTTAGTCCCCTTCGTTTTTGGGGTAGTCTAAATCCCCCTATAGTGAGTCGTATTAATTTC
F11G1-4	TAGTGTAGCTAGTCAATCCATCATTGCC	GTTTTAGTCCCCTTCGTTTTTGGGGTAGTCTAAATCCCCCTATAGTGAGTCGTATTAATTTC	TAGTGTAGCTAGTCAATCCATCATTGCCGTTTTAGTCCCCTTCGTTTTTGGGGTAGTCTAAATCCCCCTATAGTGAGTCGTATTAATTTC
F11G1-5	AGTGTAGCTAGTCAATCCATCATTGCCT	GTTTTAGTCCCCTTCGTTTTTGGGGTAGTCTAAATCCCCCTATAGTGAGTCGTATTAATTTC	AGTGTAGCTAGTCAATCCATCATTGCCTGTTTTAGTCCCCTTCGTTTTTGGGGTAGTCTAAATCCCCCTATAGTGAGTCGTATTAATTTC
F11G1-6	GTGTAGCTAGTCAATCCATCATTGCCTA	GTTTTAGTCCCCTTCGTTTTTGGGGTAGTCTAAATCCCCCTATAGTGAGTCGTATTAATTTC	GTGTAGCTAGTCAATCCATCATTGCCTAGTTTTAGTCCCCTTCGTTTTTGGGGTAGTCTAAATCCCCCTATAGTGAGTCGTATTAATTTC
F11G1-7	TGTAGCTAGTCAATCCATCATTGCCTAC	GTTTTAGTCCCCTTCGTTTTTGGGGTAGTCTAAATCCCCCTATAGTGAGTCGTATTAATTTC	TGTAGCTAGTCAATCCATCATTGCCTACGTTTTAGTCCCCTTCGTTTTTGGGGTAGTCTAAATCCCCCTATAGTGAGTCGTATTAATTTC
F11G1-8	GTAGCTAGTCAATCCATCATTGCCTACA	GTTTTAGTCCCCTTCGTTTTTGGGGTAGTCTAAATCCCCCTATAGTGAGTCGTATTAATTTC	GTAGCTAGTCAATCCATCATTGCCTACAGTTTTAGTCCCCTTCGTTTTTGGGGTAGTCTAAATCCCCCTATAGTGAGTCGTATTAATTTC
F11G1-9	TAGCTAGTCAATCCATCATTGCCTACAC	GTTTTAGTCCCCTTCGTTTTTGGGGTAGTCTAAATCCCCCTATAGTGAGTCGTATTAATTTC	TAGCTAGTCAATCCATCATTGCCTACACGTTTTAGTCCCCTTCGTTTTTGGGGTAGTCTAAATCCCCCTATAGTGAGTCGTATTAATTTC
F11G1-10	AGCTAGTCAATCCATCATTGCCTACACT	GTTTTAGTCCCCTTCGTTTTTGGGGTAGTCTAAATCCCCCTATAGTGAGTCGTATTAATTTC	AGCTAGTCAATCCATCATTGCCTACACTGTTTTAGTCCCCTTCGTTTTTGGGGTAGTCTAAATCCCCCTATAGTGAGTCGTATTAATTTC
F11G-dkrd-1	CCACAGAAATTCTACCAGTGTCAATGAC	GTTTTAGTCCCCTTCGTTTTTGGGGTAGTCTAAATCCCCCTATAGTGAGTCGTATTAATTTC	CCACAGAAATTCTACCAGTGTCAATGACGTTTTAGTCCCCTTCGTTTTTGGGGTAGTCTAAATCCCCCTATAGTGAGTCGTATTAATTTC
F11G-dkrd-2	CCACTGAAATTCTACCTGTGTCTATGAC	GTTTTAGTCCCCTTCGTTTTTGGGGTAGTCTAAATCCCCCTATAGTGAGTCGTATTAATTTC	CCACTGAAATTCTACCTGTGTCTATGACGTTTTAGTCCCCTTCGTTTTTGGGGTAGTCTAAATCCCCCTATAGTGAGTCGTATTAATTTC
F11G-dkrd-3	CGTGCTTTAACTGGAATAGCTGTTGAAC	GTTTTAGTCCCCTTCGTTTTTGGGGTAGTCTAAATCCCCCTATAGTGAGTCGTATTAATTTC	CGTGCTTTAACTGGAATAGCTGTTGAACGTTTTAGTCCCCTTCGTTTTTGGGGTAGTCTAAATCCCCCTATAGTGAGTCGTATTAATTTC
F11G-dkrd-5	CGTGCTTTAACTGGAATTGCTGTTGAAC	GTTTTAGTCCCCTTCGTTTTTGGGGTAGTCTAAATCCCCCTATAGTGAGTCGTATTAATTTC	CGTGCTTTAACTGGAATTGCTGTTGAACGTTTTAGTCCCCTTCGTTTTTGGGGTAGTCTAAATCCCCCTATAGTGAGTCGTATTAATTTC
F11G-ltbl-21	GTGTAATAACCCCTGGGACAAATCTAAC	GTTTTAGTCCCCTTCGTTTTTGGGGTAGTCTAAATCCCCCTATAGTGAGTCGTATTAATTTC	GTGTAATAACCCCTGGGACAAATCTAACGTTTTAGTCCCCTTCGTTTTTGGGGTAGTCTAAATCCCCCTATAGTGAGTCGTATTAATTTC
F11G-ltbl-122	GCACTCTTTGCTTATACTATGTCGCTAG	GTTTTAGTCCCCTTCGTTTTTGGGGTAGTCTAAATCCCCCTATAGTGAGTCGTATTAATTTC	GCACTCTTTGCTTATACTATGTCGCTAGGTTTTAGTCCCCTTCGTTTTTGGGGTAGTCTAAATCCCCCTATAGTGAGTCGTATTAATTTC
F11G-ltbl-127	TGCTTATACTATGTCGCTAGGTGCTACC	GTTTTAGTCCCCTTCGTTTTTGGGGTAGTCTAAATCCCCCTATAGTGAGTCGTATTAATTTC	TGCTTATACTATGTCGCTAGGTGCTACCGTTTTAGTCCCCTTCGTTTTTGGGGTAGTCTAAATCCCCCTATAGTGAGTCGTATTAATTTC
F11G-ltbl-175	GTGCTTCCTGTATCTATGGCTAAGACAG	GTTTTAGTCCCCTTCGTTTTTGGGGTAGTCTAAATCCCCCTATAGTGAGTCGTATTAATTTC	GTGCTTCCTGTATCTATGGCTAAGACAGGTTTTAGTCCCCTTCGTTTTTGGGGTAGTCTAAATCCCCCTATAGTGAGTCGTATTAATTTC
F11G-ltbl-177	GCTTCCTGTATCTATGGCTAAGACAGCT	GTTTTAGTCCCCTTCGTTTTTGGGGTAGTCTAAATCCCCCTATAGTGAGTCGTATTAATTTC	GCTTCCTGTATCTATGGCTAAGACAGCTGTTTTAGTCCCCTTCGTTTTTGGGGTAGTCTAAATCCCCCTATAGTGAGTCGTATTAATTTC
F11G-grn-60	GCTTGGCGTGTCTATGCTATAGGCAATG	GTTTTAGTCCCCTTCGTTTTTGGGGTAGTCTAAATCCCCCTATAGTGAGTCGTATTAATTTC	GCTTGGCGTGTCTATGCTATAGGCAATGGTTTTAGTCCCCTTCGTTTTTGGGGTAGTCTAAATCCCCCTATAGTGAGTCGTATTAATTTC
F11G-grn-87	GTGTGATATTCCTATAGGAGCGGGTGTG	GTTTTAGTCCCCTTCGTTTTTGGGGTAGTCTAAATCCCCCTATAGTGAGTCGTATTAATTTC	GTGTGATATTCCTATAGGAGCGGGTGTGGTTTTAGTCCCCTTCGTTTTTGGGGTAGTCTAAATCCCCCTATAGTGAGTCGTATTAATTTC
F11G-grn-91	TGTGATATTCCTATAGGAGCGGGTGTGT	GTTTTAGTCCCCTTCGTTTTTGGGGTAGTCTAAATCCCCCTATAGTGAGTCGTATTAATTTC	TGTGATATTCCTATAGGAGCGGGTGTGTGTTTTAGTCCCCTTCGTTTTTGGGGTAGTCTAAATCCCCCTATAGTGAGTCGTATTAATTTC
F11G-grn-97	CTATTCAGGTTACCACTGAAGTGTTGCC	GTTTTAGTCCCCTTCGTTTTTGGGGTAGTCTAAATCCCCCTATAGTGAGTCGTATTAATTTC	CTATTCAGGTTACCACTGAAGTGTTGCCGTTTTAGTCCCCTTCGTTTTTGGGGTAGTCTAAATCCCCCTATAGTGAGTCGTATTAATTTC
F11G-grn-133	CTGCGGTGATTCACAGGAATGTAACAAG	GTTTTAGTCCCCTTCGTTTTTGGGGTAGTCTAAATCCCCCTATAGTGAGTCGTATTAATTTC	CTGCGGTGATTCACAGGAATGTAACAAGGTTTTAGTCCCCTTCGTTTTTGGGGTAGTCTAAATCCCCCTATAGTGAGTCGTATTAATTTC
F11G-dkbl-24	GATGTAAACTGCACTGATGTTCCCACGG	GTTTTAGTCCCCTTCGTTTTTGGGGTAGTCTAAATCCCCCTATAGTGAGTCGTATTAATTTC	GATGTAAACTGCACTGATGTTCCCACGGGTTTTAGTCCCCTTCGTTTTTGGGGTAGTCTAAATCCCCCTATAGTGAGTCGTATTAATTTC
F11G-dkbl-25	GCTTGGCGTGTTTACTCTGCTGGAGTAA	GTTTTAGTCCCCTTCGTTTTTGGGGTAGTCTAAATCCCCCTATAGTGAGTCGTATTAATTTC	GCTTGGCGTGTTTACTCTGCTGGAGTAAGTTTTAGTCCCCTTCGTTTTTGGGGTAGTCTAAATCCCCCTATAGTGAGTCGTATTAATTTC
F11G-dkbl-64	CAGGCATTTGTGCTAGTTACCATACAGC	GTTTTAGTCCCCTTCGTTTTTGGGGTAGTCTAAATCCCCCTATAGTGAGTCGTATTAATTTC	CAGGCATTTGTGCTAGTTACCATACAGCGTTTTAGTCCCCTTCGTTTTTGGGGTAGTCTAAATCCCCCTATAGTGAGTCGTATTAATTTC
F11G-dkbl-116	TGATGCCTGTTTCAATGGCTAAGACATC	GTTTTAGTCCCCTTCGTTTTTGGGGTAGTCTAAATCCCCCTATAGTGAGTCGTATTAATTTC	TGATGCCTGTTTCAATGGCTAAGACATCGTTTTAGTCCCCTTCGTTTTTGGGGTAGTCTAAATCCCCCTATAGTGAGTCGTATTAATTTC
F11G-dkbl-150	CTACTTCAGTATGGTAGCTTTTGCACAC	GTTTTAGTCCCCTTCGTTTTTGGGGTAGTCTAAATCCCCCTATAGTGAGTCGTATTAATTTC	CTACTTCAGTATGGTAGCTTTTGCACACGTTTTAGTCCCCTTCGTTTTTGGGGTAGTCTAAATCCCCCTATAGTGAGTCGTATTAATTTC
F11G-ylw-45	AATTGGTGCTGGCATTTGTGCTAGCTAC	GTTTTAGTCCCCTTCGTTTTTGGGGTAGTCTAAATCCCCCTATAGTGAGTCGTATTAATTTC	AATTGGTGCTGGCATTTGTGCTAGCTACGTTTTAGTCCCCTTCGTTTTTGGGGTAGTCTAAATCCCCCTATAGTGAGTCGTATTAATTTC
F11G-ylw-75	CTTGGTGCTGAGAACTCTATTGCTTATG	GTTTTAGTCCCCTTCGTTTTTGGGGTAGTCTAAATCCCCCTATAGTGAGTCGTATTAATTTC	CTTGGTGCTGAGAACTCTATTGCTTATGGTTTTAGTCCCCTTCGTTTTTGGGGTAGTCTAAATCCCCCTATAGTGAGTCGTATTAATTTC
F11G-ylw-83	ACCACTGAAGTTATGCCTGTATCAATGG	GTTTTAGTCCCCTTCGTTTTTGGGGTAGTCTAAATCCCCCTATAGTGAGTCGTATTAATTTC	ACCACTGAAGTTATGCCTGTATCAATGGGTTTTAGTCCCCTTCGTTTTTGGGGTAGTCTAAATCCCCCTATAGTGAGTCGTATTAATTTC
F11G-ylw-86	TATCTGTGGTGACTCTATAGAGTGTAGC	GTTTTAGTCCCCTTCGTTTTTGGGGTAGTCTAAATCCCCCTATAGTGAGTCGTATTAATTTC	TATCTGTGGTGACTCTATAGAGTGTAGCGTTTTAGTCCCCTTCGTTTTTGGGGTAGTCTAAATCCCCCTATAGTGAGTCGTATTAATTTC
F11G-ylw-90	TGTGGTGACTCTATAGAGTGTAGCAACT	GTTTTAGTCCCCTTCGTTTTTGGGGTAGTCTAAATCCCCCTATAGTGAGTCGTATTAATTTC	TGTGGTGACTCTATAGAGTGTAGCAACTGTTTTAGTCCCCTTCGTTTTTGGGGTAGTCTAAATCCCCCTATAGTGAGTCGTATTAATTTC
F11G-prpl-6	ACACCTGGTACTAATGCTTCAACACAAG	GTTTTAGTCCCCTTCGTTTTTGGGGTAGTCTAAATCCCCCTATAGTGAGTCGTATTAATTTC	ACACCTGGTACTAATGCTTCAACACAAGGTTTTAGTCCCCTTCGTTTTTGGGGTAGTCTAAATCCCCCTATAGTGAGTCGTATTAATTTC
F11G-prpl-23	GCCTACAGCTATACATGCTGAACAACTC	GTTTTAGTCCCCTTCGTTTTTGGGGTAGTCTAAATCCCCCTATAGTGAGTCGTATTAATTTC	GCCTACAGCTATACATGCTGAACAACTCGTTTTAGTCCCCTTCGTTTTTGGGGTAGTCTAAATCCCCCTATAGTGAGTCGTATTAATTTC
F11G-prpl-54	CATGTTTCAGACACAAGCAGGCTGCTTG	GTTTTAGTCCCCTTCGTTTTTGGGGTAGTCTAAATCCCCCTATAGTGAGTCGTATTAATTTC	CATGTTTCAGACACAAGCAGGCTGCTTGGTTTTAGTCCCCTTCGTTTTTGGGGTAGTCTAAATCCCCCTATAGTGAGTCGTATTAATTTC
F11G-prpl-105	CACAATTAGTGTGACCACGGAAGTGATG	GTTTTAGTCCCCTTCGTTTTTGGGGTAGTCTAAATCCCCCTATAGTGAGTCGTATTAATTTC	CACAATTAGTGTGACCACGGAAGTGATGGTTTTAGTCCCCTTCGTTTTTGGGGTAGTCTAAATCCCCCTATAGTGAGTCGTATTAATTTC
		DISTRIBUTION STATEMENT A. Approved for public release: distribution is unlimited.

## Sheet: Targets
Synthetic target sequences
isolate	species	source	accesion #	sequence
WuhanHu1	SARS-CoV-2	human	NC 045512.2	AGATTCTTGACATTACACCATGTTCTTTTGGTGGTGTCAGTGTTATAACACCAGGAACAAATACTTCTAACCAGGTTGCTGTTCTTTATCAGGATGTTAACTGCACAGAAGTCCCTGTTGCTATTCATGCAGATCAACTTACTCCTACTTGGCGTGTTTATTCTACAGGTTCTAATGTTTTTCAAACACGTGCAGGCTGTTTAATAGGGGCTGAACATGTCAACAACTCATATGAGTGTGACATACCCATTGGTGCAGGTATATGCGCTAGTTATCAGACTCAGACTAATTCTCCTCGGCGGGCACGTAGTGTAGCTAGTCAATCCATCATTGCCTACACTATGTCACTTGGTGCAGAAAATTCAGTTGCTTACTCTAATAACTCTATTGCCATACCCA…
BANAL236	SARS-likeCoV	bat	EPI_ISL_4302647	AGATTCTTGACATTACACCATGTTCTTTTGGTGGTGTCAGTGTTATAACACCAGGAACAAATGCCTCTAACCAGGTTGCTGTTCTTTATCAGGATGTTAACTGCACAGAAGTCCCTGTAGCTATCCATGCAGACCAACTTACTCCTACTTGGCGTGTTTACTCTACAGGTTCTAATGTTTTTCAAACACGTGCAGGCTGTTTAATAGGGGCTGAACATGTTAATAACTCGTATGAGTGTGACATACCTATTGGTGCTGGGATATGCGCCAGTTATCAGACTCAAACTAATTCACGTAGTGTGGCCAGTCAATCCATTATCGCCTACACTATGTCACTTGGTGCAGAAAATTCAGTTGCTTACTCTAATAACTCTATTGCCATACCTACAAATTTTACTA…
RaTG13	SARS-likeCoV	bat	EPI_ISL_402131	AGATTCTTGACATTACACCATGTTCTTTTGGTGGTGTCAGTGTTATAACACCTGGAACAAATGCCTCTAACCAGGTTGCTGTTCTTTATCAGGATGTTAACTGCACAGAAGTCCCTGTTGCTATCCATGCAGACCAACTTACTCCCACTTGGCGTGTTTACTCCACAGGTTCTAATGTTTTTCAAACACGTGCAGGTTGTTTAATAGGGGCTGAACATGTCAATAACTCGTATGAGTGTGACATACCTATTGGTGCAGGAATATGCGCCAGTTATCAGACTCAAACTAATTCACGTAGTGTGGCCAGTCAATCTATTATTGCCTACACTATGTCACTTGGTGCAGAAAATTCAGTTGCTTATTCTAATAACTCTATTGCCATACCTACAAATTTTACTA…
RShSTT182	SARS-likeCoV	bat	EPI_ISL_852604	AGGTGTTAGACATAACACCATGTTCTTTTGGTGGTGTTAGTGTCATAACGCCTGGAACTAATACCTCTACTCAAGTAGCTGTTCTTTATCAAGATGTCAATTGTACTGACGTCCCGTCTGCAATCCATGCTGACCAGCTTTCATCCACTTGGCGTGTTTATTCTACAGGTCCTAATGTTTTTCAAACACGCGCAGGCTGTTTAATAGGGGCTGAACATGTCAACAATTCATATGATTGTGACATACCCATTGGTGCAGGTATATGCGCCAGTTACCAGACTCAAACTAATTCACGTAGTGTAACCAGTCAATCCATTATTGCTTACACTATGTCACTTGGTGCAGAAAATTCAGTTGCTTATTCTAATAACTCTATTGCCATACCTACAAATTTCACCA…
MP789	SARS-likeCoV	pangolin	MT121216.1	AAATTCTTGATATCACACCGTGTTCTTTTGGTGGTGTCAGTGTTATAACACCAGGAACAAACACTTCTAACCAAGTGGCTGTTCTTTATCAGGATGTTAACTGCACTGAAGTCCCTGTTGCTATTCATGCAGATCAATTAACACCAACCTGGCGTGTTTACTCTACAGGTTCAAATGTTTTTCAAACGCGTGCAGGCTGTTTAATAGGGGCTGAACATGTTAACAACACTTACGAGTGTGACATACCAATTGGTGCAGGAATATGTGCCAGTTATCAGACTCAAACTAATTCACGTAGTGTTTCAAGTCAAGCTATTATTGCCTACACTATGTCACTTGGTGCAGAAAATTCAGTTGCTTATGCTAATAACTCTATTGCCATACCTACAAATTTTACTA…
P4L	SARS-likeCoV	pangolin	EPI_ISL_410538	AAATACTTGACATTACCCCTTGCTCTTTTGGAGGAGTTAGTGTGATAACACCAGGTACAAACACTTCTAATCAAGTGGCTGTACTTTACCAAGATGTTAACTGTACTGAAGTGCCTATGGCCATTCATGCAGAACAACTTACACCTGCCTGGCGTGTTTACTCTGCAGGAGCAAATGTGTTTCAAACAAGAGCAGGCTGTTTAGTAGGTGCTGAGCATGTCAACAATTCTTATGAATGTGACATTCCAGTCGGTGCTGGCATATGTGCAAGTTACCATTCCATGTCATCATTGCGTAGTGTCAACCAGCGTTCAATCATTGCTTACACTATGTCTTTAGGTGCAGAAAATTCAGTTGCTTATTCTAATAATTCAATTGCCATACCTACTAATTTTACAA…
RsYN04	SARS-likeCoV	bat	EPI_ISL_1699444	CCATATTGGACATCACACCATGTTCATTTGGAGGCGTTAGTGTAATAACCCCTGGGACAAATCTAACTAATGAGGTCGCTGTTCTATACCAGGATGTTAATTGTACAGATGTGCCTACGCTACTTAGTCTTAATGACTACAATGTAGGCTGGCGCGTTTATTCTACGGGCACTTCCCGCTTCCAAATACAAGCAGGTTGTCTTATTGGTGCCCAATATCAGAATGTTACTAAGGAATGTGACATTCCTATAGGTGCTGGTGTGTGTGCTTCTTACACTACGAAGGCTAGAACTTCGTCTACTCCTGCACTCTTTGCTTATACTATGTCGCTAGGTGCTACCCAGAGCCCAGCTTATGCTAATAATACAGTCCTCATACCCACAAACTTTTCCGTCTCTG…
BANAL247	SARS-likeCoV	bat	EPI_ISL_4302648	AAATATTAGACATCTCACCATGTTCTTTTGGTGGCGTTAGTGTTATTACGCCTGGTACACAAACTTCCTCTAAAGTGGCTGTCTTGTACCAAGATGTCAACTGTACGGACGTGCCCACGGCACTGGGTCTGGACCAAATTTCAGCTGCTTGGCGTGTTTATGCTATAGGCAATGACGTTTTCCAGACCCAGGCCGGTTGTTTAGTGGGGGCTGAGCATACTAACATCTCTTATGAGTGTGATATTCCCATAGGAGCGGGTGTGTGTGCCAGTTACAACTCACCTGCAGCGCGTGTAGGTACTAATTCCATTATTGCCTACGCGATGTCAATTGGTGCAGAAAGTTCTATTGCATATTCTAATAACTCAATAGCCATACCTACCAATTTTTCTATTCAGG…
RacCS203	SARS-likeCoV	bat	MW251308.1	AAATATTAGACATCTCACCATGTTCTTTTGGTGGCGTTAGTGTAATCACACCTGGTACTCAAACTTCCTCTAAAGTGGCTGTTTTGTACCAGGATGTTAATTGTACAGACGTGCCTACAGCACTGGGTCTGGACCAAATTTCAGCTGCTTGGCGTGTCTATGCTATAGGCAATGATGTTTTCCAAACTCAGGCTGGTTGTTTAGTGGGGGCTGAGCACGCTAACACCTCTCATGAGTGTGATATTCCTATAGGAGCAGGTGTGTGTGCCAGTTATAACTCACCTGTAGCACGTGTAGGTACTAATTCTATTATTGCCTACGAGATGTCAATTGGTGCAGAGAGTTCTATTGCATATGCTAATAACTCGATAGCCATACCTACCAACTTTTCTATTCAGG…
RsYN03	SARS-likeCoV	bat	EPI ISL 1699443	AAATACTTGACATTTCACCATGTTCATTTGGTGGTGTGAGTGTAATAACACCAGGAACAAATGCTTCATCTGAAGTAGCCGTTCTATACCAAGATGTAAACTGCACTGATGTTCCCACGGCCATACGTGCTGACCAACTCACACCTGCTTGGCGTGTTTACTCTGCTGGAGTAAATGTGTTTCAAACTCAGGCTGGCTGTTTAATAGGAGCGGAACATGTCAATGCTTCATATGAGTGTGACATTCCCATTGGTGCAGGCATTTGTGCTAGTTACCATACAGCTTCCCTTTTACGTAATACAGGCCAGAAATCAATTGTGGCCTATACTATGTCACTTGGTGCTGAAAACTCAATTGCTTATGCTAATAACTCAATTGCCATACCTACAAATTTTTCAA…
CoVZC45	SARS-likeCoV	bat	MG772933.1	AGATACTTGACATTACACCTTGCTCTTTTGGTGGTGTCAGTGTTATAACACCAGGAACAAACACTTCTTTAGAGGTGGCTGTTCTTTACCAAGATGTTAACTGCACTGATGTACCAACTACTATACATGCAGACCAACTAACACCTGCTTGGCGTATTTATGCTACTGGCACTAATGTGTTTCAAACTCAAGCAGGCTGTCTTATAGGAGCTGAACATGTCAATGCTTCTTATGAGTGTGACATCCCAATTGGTGCTGGTATTTGTGCTAGCTACCATACGGCTTCTATATTACGCAGTACAAGCCAGAAAGCTATTGTGGCTTATACTATGTCCCTTGGTGCTGAGAACTCTATCGCTTATGCTAACAATTCTATAGCCATACCTACAAATTTTTCAA…
RpYN06	SARS-likeCoV	bat	EPI ISL 1699446	AAATACTTGACATTACACCTTGTTCTTTTGGTGGTGTCAGTGTAATAACACCAGGAACAAACACTTCTTTAGAGGTGGCTGTTCTTTATCAAGATGTTAACTGCACTGATGTACCAACTACTATACATGCAGACCAATTAACACCTGCTTGGCGCATTTACGCTACTGGCGCTAATGTGTTTCAAACTCAAGCAGGCTGTCTTATAGGAGCTGAACATGTCAATGCTTCTTATGAGTGTGACATTCCAATTGGTGCTGGCATTTGTGCTAGCTACCATGCGGCTTCTATATTACGTAGTACAAGTCAGAAAGCTATTGTTGCTTATACTATGTCCCTTGGTGCTGAGAACTCCATTGCTTATGCTAACAATTCTATAGCCATACCTACAAATTTTTCAA…
Rco319	SARS-likeCoV	bat	LC556375.1	AAGTATTAGACATCACACCATGCTCTTATGGTGGTGTCAGTGTTATTACACCTGGTACTAATGCTTCAACACAAGTTGCTGTCTTATACCAAGATGTTAATTGTACTGATGTGCCTACAGCTATACATGCTGAACAACTCACACCTTCATGGAGAGTTTATTCAACAGGCACAAACATGTTTCAGACACAAGCAGGCTGCTTGATTGGCGCTGAACATGTGAATAATAGTTATGATTGTGATATACCAATTGGCGCAGGCATCTGCGCTACATATCACACGCCATCTATGCTACGTAGCGCAAACAACAATAAGAGAATTGTTGCTTACGTTATGTCTCTTGGTGCTGAAAACTCTGTAGCTTATTCCAACAACACTATAGCAATTCCAACCAATTTCA…
DISTRIBUTION STATEMENT A. Approved for public release: distribution is unlimited.

## Sheet: Primers
Target amplification primers
Forward primers
Name	Sequence
SARS-CoV-2_Wuhan-Hu-1	GAAATTAATACGACTCACTATAGGGCACCATGTTCTTTTGGTGGTGT
SARS-like-CoV _BANAL-236	GAAATTAATACGACTCACTATAGGGCACCATGTTCTTTTGGTGGTGT
SARS-like-CoV_RaTG13	GAAATTAATACGACTCACTATAGGGCACCATGTTCTTTTGGTGGTGT
SARS-like-CoV_RShSTT182	GAAATTAATACGACTCACTATAGGGCACCATGTTCTTTTGGTGGTGT
SARS-like-CoV_MP789	GAAATTAATACGACTCACTATAGGGCACCGTGTTCTTTTGGTGGTGT
SARS-like-CoV_P4L	GAAATTAATACGACTCACTATAGGGCCCCTTGCTCTTTTGGAGGAGT
SARS-like-CoV_RsYN04	GAAATTAATACGACTCACTATAGGGCACCATGTTCATTTGGAGGCGT
SARS-like-CoV_BANAL-247	GAAATTAATACGACTCACTATAGGGCACCATGTTCTTTTGGTGGCGT
SARS-like-CoV_RacCS203	GAAATTAATACGACTCACTATAGGGCACCATGTTCTTTTGGTGGCGT
SARS-like-CoV_RsYN03	GAAATTAATACGACTCACTATAGGGCACCATGTTCATTTGGTGGTGT
SARS-like-CoV_SL-CoVZC45	GAAATTAATACGACTCACTATAGGGCACCTTGCTCTTTTGGTGGTGT
SARS-like-CoV_RpYN06	GAAATTAATACGACTCACTATAGGGCACCTTGTTCTTTTGGTGGTGT
SARS-like-CoV_Rc-o319	GAAATTAATACGACTCACTATAGGGCACCATGCTCTTATGGTGGTGT
Reverse primers
Name	Sequence
SARS-CoV-2_Wuhan-Hu-1	TGTGCAAAAACTTCTTGGGTGT
SARS-like-CoV_BANAL-236	TGAGCAAAAACTTCTTGTGTGT
SARS-like-CoV_RaTG13	TGAGCAAAAACTTCTTGAGTAT
SARS-like-CoV_RShSTT182	TGTGCAAAAACCTCTTGAGTGT
SARS-like-CoV_MP789	TGTGCAAAAACTTCCTGTGTGT
SARS-like-CoV_P4L	TGGGCAAAAACTTCTTGTGTGT
SARS-like-CoV_RsYN04	TGGGCAAAAACATCTTGCGTGT
SARS-like-CoV_BANAL-247	TGAGCAAAAACTGCTTCAGTGT
SARS-like-CoV_RacCS203	TGAGCAAAAACAGCTTCAGTAT
SARS-like-CoV_RsYN03	TGGGCAAAAACCTCTTGAGTGT
SARS-like-CoV_SL-CoVZC45	TGAGCAAAAACCTCTTGGGTGT
SARS-like-CoV_RpYN06	TGAGCAAAAACCTCTTGAGTGT
SARS-like-CoV_Rc-o319	TGAGCGAACACTTCTTGCGTGT
DISTRIBUTION STATEMENT A. Approved for public release: distribution is unlimited.
